# Supplementary material for: Comprehensive Genomic Analysis and Expression Profiling of Diacylglycerol Kinase (DGK) Gene Family in Soybean (Glycine max) under Abiotic Stresses
Source: PubMed Central journal article supplement (PMC6470530; doi:10.3390/ijms20061361), 2019-03-18
Supplement: ijms-20-01361-s001.pdf [file ijms-20-01361-s001.pdf]

**Table S1.** Primers used for quantitative real-time PCR analyses. F—forward; R—reverse.

| <i>Gene Name</i> | <i>Primers for qRT-PCR (5'–3')</i>                              |
|------------------|-----------------------------------------------------------------|
| <i>GmDGK1</i>    | F: CTGGCACATTCTTATGCGGATGAG<br>R: CCATCCTTGTGTGCATCCAAGC        |
| <i>GmDGK2</i>    | F: CGGGGATCCATGTGTGACAGTTTGG<br>R: GCTCTAGATTATGAAAGATTGATGGCCA |
| <i>GmDGK3</i>    | F: CTTATGCGGATGAGGGCTCC<br>R: CAGTTGGTCAATCAGAGTAC              |
| <i>GmDGK4</i>    | F: GAAAATGTCGGTGACGTGCC<br>R: CGGGTTATCAGTTTGCTGA               |
| <i>GmDGK5</i>    | F: GATCGTGGAGTCGTTGCC<br>R: CACTCATTAGATGTTGAAGCCTC             |
| <i>GmDGK6</i>    | F: CATCAACAACCTGGAGACACGAGC<br>R: GCTTTGTGGTCGTCTTTGCTAC        |
| <i>GmDGK7</i>    | F: GGTCTCGTTCGTGGAATCG<br>R: CTCAGCGCGGCTAATGTAGC               |
| <i>GmDGK8</i>    | F: GTAAAAGGGGCAAGGGAAATG<br>R: CCCC CGGTAAGTGTGGT               |
| <i>GmDGK9</i>    | F: GCTACTGTGCCATTGGGGAC<br>R: CTCAAGGGGTGCAATAGGGT              |
| <i>GmDGK10</i>   | F: CCACGGGTGACACGAACAAG<br>R: CTCGGCACGGTTGATGTAGC              |
| <i>GmDGK11</i>   | F: TCAAACCCTTGGGCCTATAGTA<br>R: ATCCAACGAACAGTCCATTGGT          |
| <i>GmDGK12</i>   | F: CTCTAGGACCTATTGTAGCTCTG<br>R: GGTCAGCTACATCTGTCCAACA         |

**Table S2.** The accession numbers of all the DGKs are listed. *Glycine max* (Gm), *Arabidopsis thaliana* (At), *Oryza sativa* (Os), and *Malus domestica* (Md) DGKs.

| <i>Gene Name</i> | <i>Gene Locus</i> | <i>GenBank or UniProtKB Accession</i> | <i>Length (aa)</i> | <i>Molecular Mass (kDa)</i> | <i>cDNA/EST</i> |
|------------------|-------------------|---------------------------------------|--------------------|-----------------------------|-----------------|
| <i>AtDGK1</i>    | AT5G07920         | NP_196409                             | 728                | 80.0                        | BT004148        |
| <i>AtDGK2</i>    | AT5G63770         | NP_201182                             | 712                | 79.4                        | AY380783        |
| <i>AtDGK3</i>    | AT2G18730         | NP_849980                             | 488                | 53.9                        | AY141990        |
| <i>AtDGK4</i>    | AT5G57690         | NP_200577                             | 487                | 55.5                        | DQ447086        |
| <i>AtDGK5a</i>   | AT2G20900         | AAM62810                              | 491                | 55.3                        | AY085589        |
| <i>AtDGK5b</i>   | AT2G20900         | NP_850007                             | 509                | 57.4                        | AC006234        |
| <i>AtDGK6</i>    | AT4G28130         | NP_194542                             | 466                | 52.5                        | AL035524        |
| <i>AtDGK7</i>    | AT4G30340         | NP_567845                             | 492                | 54.6                        | AF360174        |
| <i>GmDGK1</i>    | Glyma.13G302200   | XP_003541921.1                        | 430                | 48.62                       | XM_003541873.1  |
| <i>GmDGK2</i>    | Glyma.05G196100   | XP_006580353.1                        | 725                | 78.6                        | XM_006580290.2  |
| <i>GmDGK3</i>    | Glyma.12G200100   | XP_014632628                          | 480                | 53.7                        | XM_014777142    |
| <i>GmDGK4</i>    | Glyma.06G299200   | XP_003526295                          | 484                | 54.29                       | XM_003526247    |
| <i>GmDGK5</i>    | Glyma.06G223900   | XP_014632628                          | 480                | 53.76                       | XM_014777142    |
| <i>GmDGK6</i>    | Glyma.04G143000   | XP_003552048                          | 485                | 54.2                        | XM_003552000    |
| <i>GmDGK7</i>    | Glyma.13G093100   | XP_003542286                          | 480                | 53.54                       | XM_003542238    |
| <i>GmDGK8</i>    | Glyma.06G2549001  | XP_014632201                          | 504                | 56.32                       | XM_014776715    |
| <i>GmDGK9</i>    | Glyma.12G146700   | XP_006592585                          | 485                | 54.35                       | XM_006592522    |
| <i>GmDGK10</i>   | Glyma.17G067400   | XP_014625529.3                        | 480                | 53.56                       | XM_014770043    |
| <i>GmDGK11</i>   | Glyma.17G077100   | XP_014625346.1                        | 727                | 80.97                       | XM_014769860    |
| <i>GmDGK12</i>   | Glyma.05G022500   | XP_006579516                          | 727                | 80.93                       | XM_006579453    |
| <i>OsDGK1</i>    | OS04G54200        | EAZ32109                              | 541                | 60.3                        | CM000141        |
| <i>OsDGK2</i>    | OS08G08110        | NP_001061130                          | 502                | 55.8                        | AP008214        |
| <i>OsDGK3</i>    | OS02G54650        | NP_001048345                          | 488                | 53.9                        | AP005535        |
| <i>OsDGK4</i>    | OS12G38780        | NP_001067111                          | 705                | 78.7                        | DP000011        |
| <i>OsDGK5</i>    | OS03G31180        | ABF96709                              | 616                | 68.1                        | DP000009        |
| <i>OsDGK6</i>    | OS08G15090        | BAD05689                              | 527                | 57.1                        | AP005495        |
| <i>OsDGK7</i>    | OS01G57420        | EEE55501                              | 499                | 55.9                        | CM000138        |
| <i>OsDGK8</i>    | OS12G12260        | ABG21922                              | 663                | 72.8                        | DP000011        |

|               |               |          |     |      |          |
|---------------|---------------|----------|-----|------|----------|
| <i>MdDGK1</i> | MDP0000900186 | KM099881 | 707 | 79.3 | CN874967 |
| <i>MdDGK2</i> | MDP0000246501 | KM099882 | 489 | 54.6 | CN890995 |
| <i>MdDGK3</i> | MDP0000276007 | EB177954 | 724 | 80.2 | EB177954 |
| <i>MdDGK4</i> | MDP0000139683 | GO512216 | 502 | 54.5 | GO512216 |
| <i>MdDGK5</i> | MDP0000401076 | KM099880 | 522 | 58.5 | CN892391 |
| <i>MdDGK6</i> | MDP0000237723 | GO552958 | 488 | 54.5 | GO552958 |
| <i>MdDGK7</i> | MDP0000286961 | KM099883 | 737 | 81.6 | EB110199 |
| <i>MdDGK8</i> | MDP0000171640 | DR992213 | 538 | 60.2 | DR992213 |

**Table S3.** Subcellular localization data found on **DeepLoc-1.0**; the uncolored cases represent the highest values for each gene in different parts of the cell. From top to bottom, the values in the table are colored differently according to clusters I, II, and III.

| Genes          | Nucleus | Cytoplasm | Peroxisome | Cell Membrane | Mitochondrion | Lysosome | Golgi Apparatus | Endoplasmic Reticulum | Extra Cellular | Platid  |
|----------------|---------|-----------|------------|---------------|---------------|----------|-----------------|-----------------------|----------------|---------|
| <i>GmDGK2</i>  | 0.0002  | 0         | 0.0001     | 0.7858        | 0.0008        | 0.0152   | 0.0935          | 0.1044                | 0              | 0       |
| <i>GmDGK11</i> | 0.0046  | 0.0004    | 0.0112     | 0.4733        | 0.0278        | 0.0728   | 0.1536          | 0.2536                | 0.001          | 0.0017  |
| <i>GmDGK12</i> | 0.0013  | 0.0003    | 0.0013     | 0.6059        | 0.0041        | 0.0395   | 0.1734          | 0.1736                | 0.0001         | 0.0006  |
| <i>AtDGK1</i>  | 0.0003  | 0         | 0.0002     | 0.8015        | 0.0004        | 0.0044   | 0.1111          | 0.0821                | 0.0001         | 0       |
| <i>AtDGK2</i>  | 0.0001  | 0         | 0          | 0.7834        | 0.0001        | 0.0007   | 0.1733          | 0.0422                | 0              | 0       |
| <i>GmDGK5</i>  | 0.0781  | 0.5242    | 0.1985     | 0.0734        | 0.0589        | 0.0187   | 0.0095          | 0.0266                | 0.0055         | 0.0066  |
| <i>GmDGK6</i>  | 0.2288  | 0.6091    | 0.0339     | 0.0066        | 0.0414        | 0.0133   | 0.0105          | 0.0124                | 0.0088         | 0.0351  |
| <i>GmDGK7</i>  | 0.2419  | 0.4886    | 0.034      | 0.0586        | 0.092         | 0.0273   | 0.0196          | 0.0254                | 0.0053         | 0.0072  |
| <i>GmDGK10</i> | 0.463   | 0.3372    | 0.0123     | 0.0482        | 0.0688        | 0.0125   | 0.0087          | 0.0046                | 0.0067         | 0.0379  |
| <i>AtDGK3</i>  | 0.4414  | 0.2774    | 0.1085     | 0.0666        | 0.0377        | 0.0174   | 0.0164          | 0.0151                | 0.0105         | 0.009   |
| <i>AtDGK4</i>  | 0.3848  | 0.3591    | 0.0154     | 0.1309        | 0.008         | 0.043    | 0.0172          | 0.0117                | 0.0279         | 0.0021  |
| <i>AtDGK7</i>  | 0.5091  | 0.3567    | 0.0071     | 0.0567        | 0.0048        | 0.0175   | 0.0139          | 0.0112                | 0.0222         | 0.0001  |
| <i>GmDGK1</i>  | 0.227   | 0.4039    | 0.1129     | 0.0527        | 0.1044        | 0.0145   | 0.0408          | 0.0241                | 0.0071         | 0.0126  |
| <i>GmDGK3</i>  | 0.2122  | 0.3607    | 0.2087     | 0.0677        | 0.0782        | 0.0097   | 0.0187          | 0.0174                | 0.0091         | 0.0187  |
| <i>GmDGK4</i>  | 0.212   | 0.49      | 0.112      | 0.0663        | 0.0553        | 0.0173   | 0.014           | 0.0114                | 0.0109         | 0.0108  |
| <i>GmDGK8</i>  | 0.2563  | 0.5964    | 0.0152     | 0.0569        | 0.021         | 0.0169   | 0.0117          | 0.0089                | 0.013          | 0.0036  |
| <i>GmDGK9</i>  | 0.2012  | 0.5483    | 0.0758     | 0.0989        | 0.0142        | 0.0202   | 0.0154          | 0.0096                | 0.0141         | 0.0022  |
| <i>AtDGK5</i>  | 0.1692  | 0.6145    | 0.0836     | 0.0434        | 0.0313        | 0.0186   | 0.0154          | 0.0112                | 0.0087         | 0.004   |
| <i>AtDGK6</i>  | 0.287   | 0.6074    | 0.0077     | 0.0558        | 0.0059        | 0.0143   | 0.0076          | 0.0043                | 0.0081         | 0.00019 |

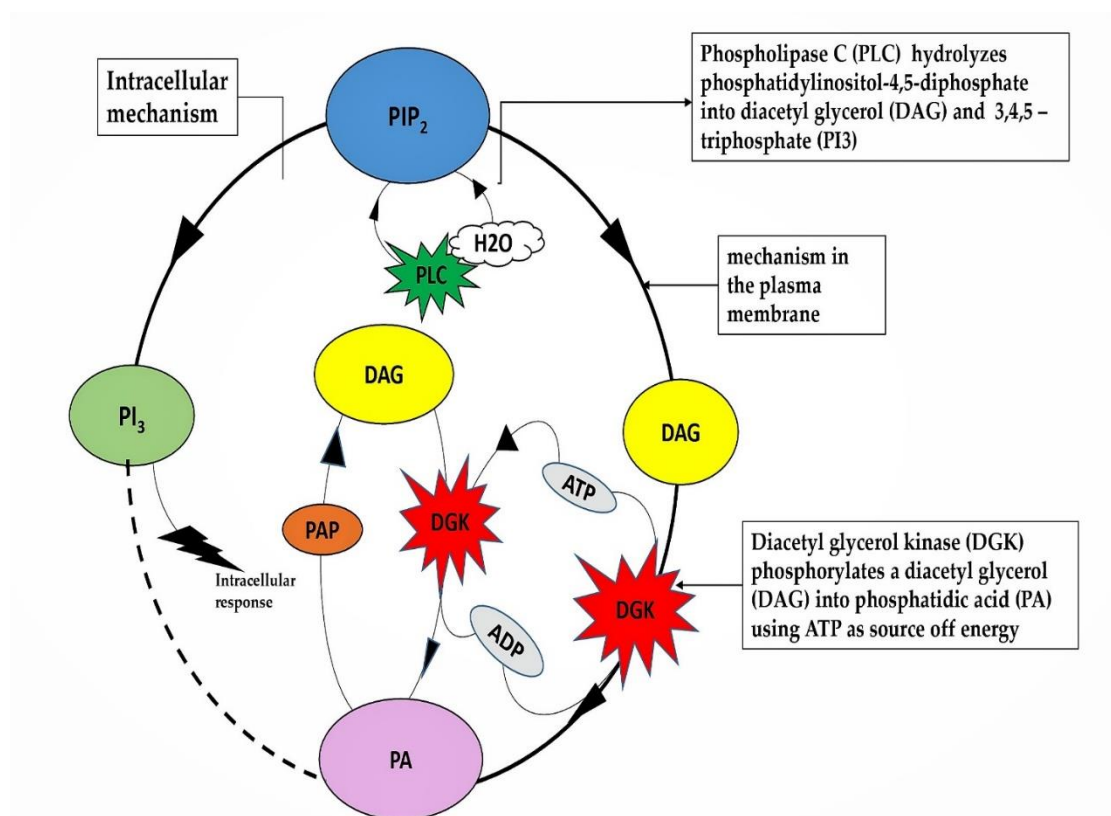

**Figure S1.** The general function of DGKs in eukaryotic cells, i.e., phosphate acid (PA) production via the coupled action of phospholipase C and diacylglycerol kinase.
